# Supplementary material
Source: PubMed Central journal article supplement (PMC2629797)

## Supporting Information

# Synthesis and Anticancer Activity Comparison of Phenylalkyl Isoselenocyanates with Corresponding Naturally Occurring and Synthetic Isothiocyanates

*Arun K. Sharma,\* Arati Sharma, Dhimant Desai, SubbaRao V. Madhunapantula, Sung Jin Huh,  
Gavin P. Robertson, and Shantu Amin*

Department of Pharmacology, H072; Chemical Carcinogenesis and Chemoprevention Program  
of Penn State Hershey Cancer Institute, Penn State Hershey College of Medicine,  
Hershey, PA 17033.

aks14@psu.edu

---

### Table of Contents

#### <sup>1</sup>H NMR data

|           |       |    |
|-----------|-------|----|
| <b>1c</b> | ..... | S2 |
| <b>1d</b> | ..... | S2 |

#### <sup>1</sup>H NMR Spectra

|           |       |     |
|-----------|-------|-----|
| <b>1c</b> | ..... | S3  |
| <b>1d</b> | ..... | S4  |
| <b>2a</b> | ..... | S5  |
| <b>4b</b> | ..... | S6  |
| <b>2b</b> | ..... | S7  |
| <b>4c</b> | ..... | S8  |
| <b>2c</b> | ..... | S9  |
| <b>4d</b> | ..... | S10 |
| <b>2d</b> | ..... | S11 |
| <b>5</b>  | ..... | S12 |
| <b>6</b>  | ..... | S13 |

**Phenylbutyl isothiocyanate (1c)** and **Phenylhexyl isothiocyanate (1d)** were synthesized according to a literature method and their purity was confirmed by 500 MHz  $^1\text{H}$  NMR spectra.

**Phenylbutyl isothiocyanate (1c).**  $^1\text{H}$  NMR ( $\text{CDCl}_3$ , 500 MHz)  $\delta$  1.72-1.80 (m, 4H), 2.66 (t, 2H,  $J = 7.0$  Hz), 3.52 (t, 2H,  $J = 6.5$  Hz), 7.17-7.22 (m, 3H), 7.28-7.31 (m, 2H).

**Phenylhexyl isothiocyanate (1d).**  $^1\text{H}$  NMR ( $\text{CDCl}_3$ , 500 MHz)  $\delta$  1.34-1.40 (m, 2H), 1.42-1.48 (m, 2H), 1.62-1.72 (m, 4H), 2.63 (t, 2H,  $J = 7.5$  Hz), 3.50 (t, 2H,  $J = 6.5$  Hz), 7.18-7.21 (m, 3H), 7.28-7.31 (m, 2H).

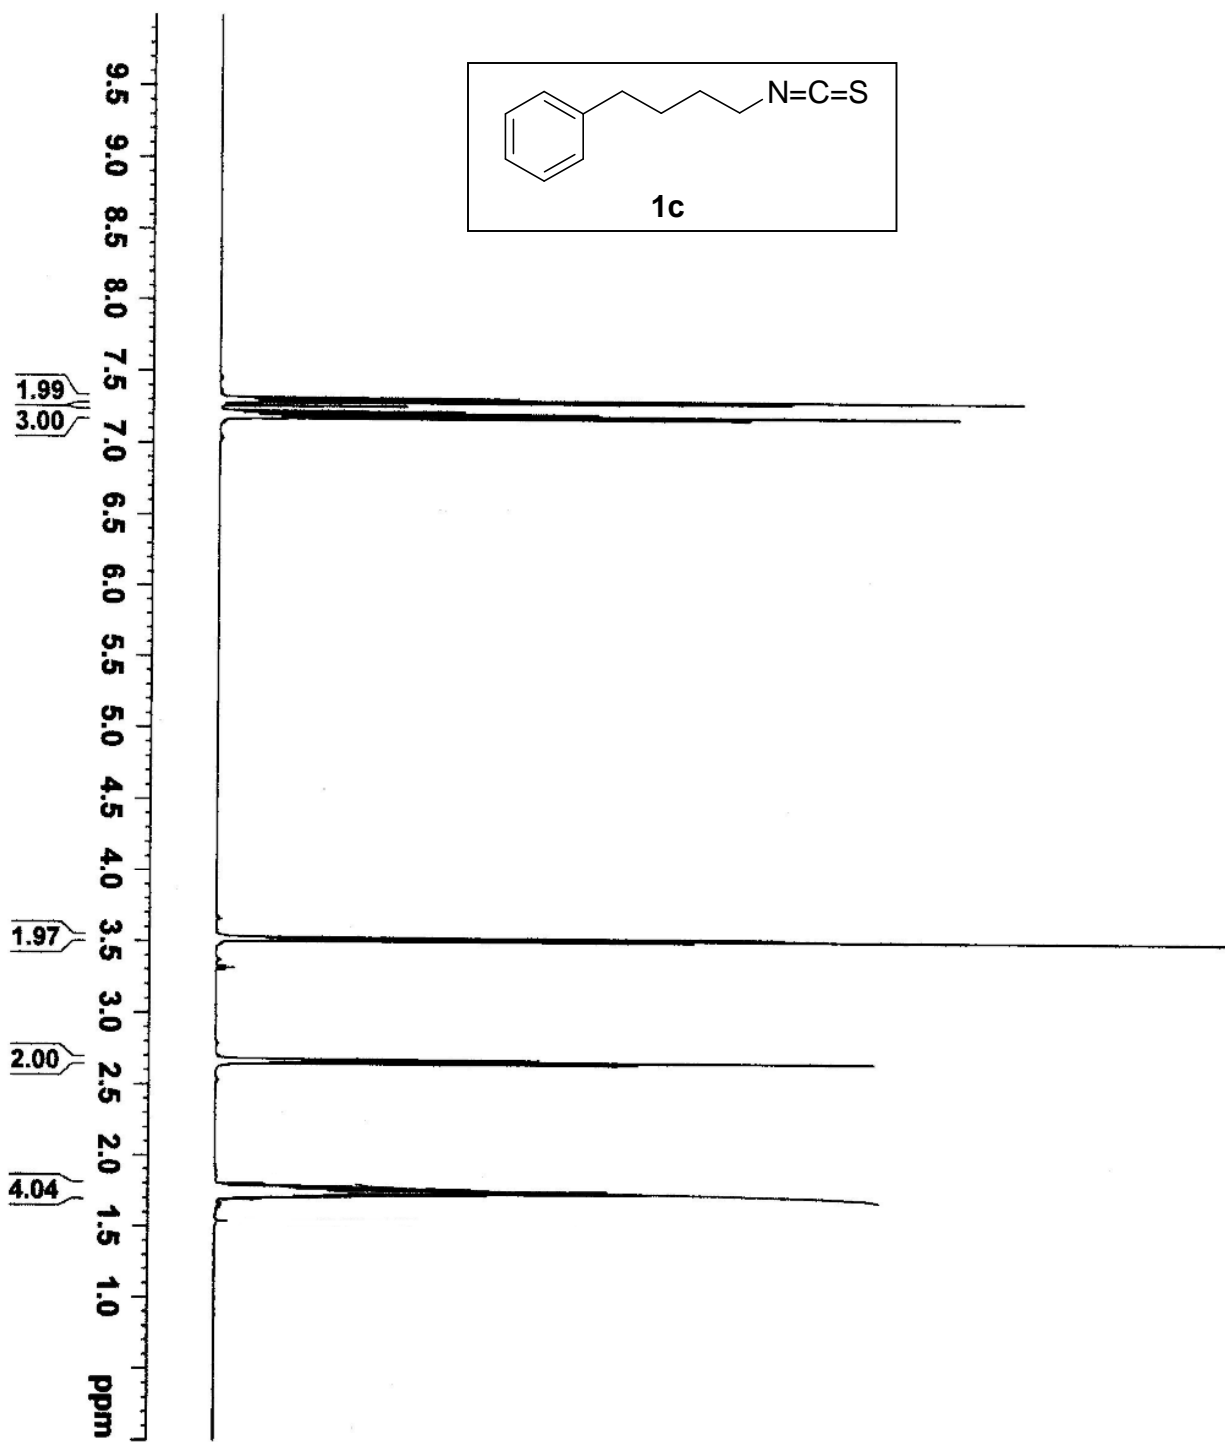

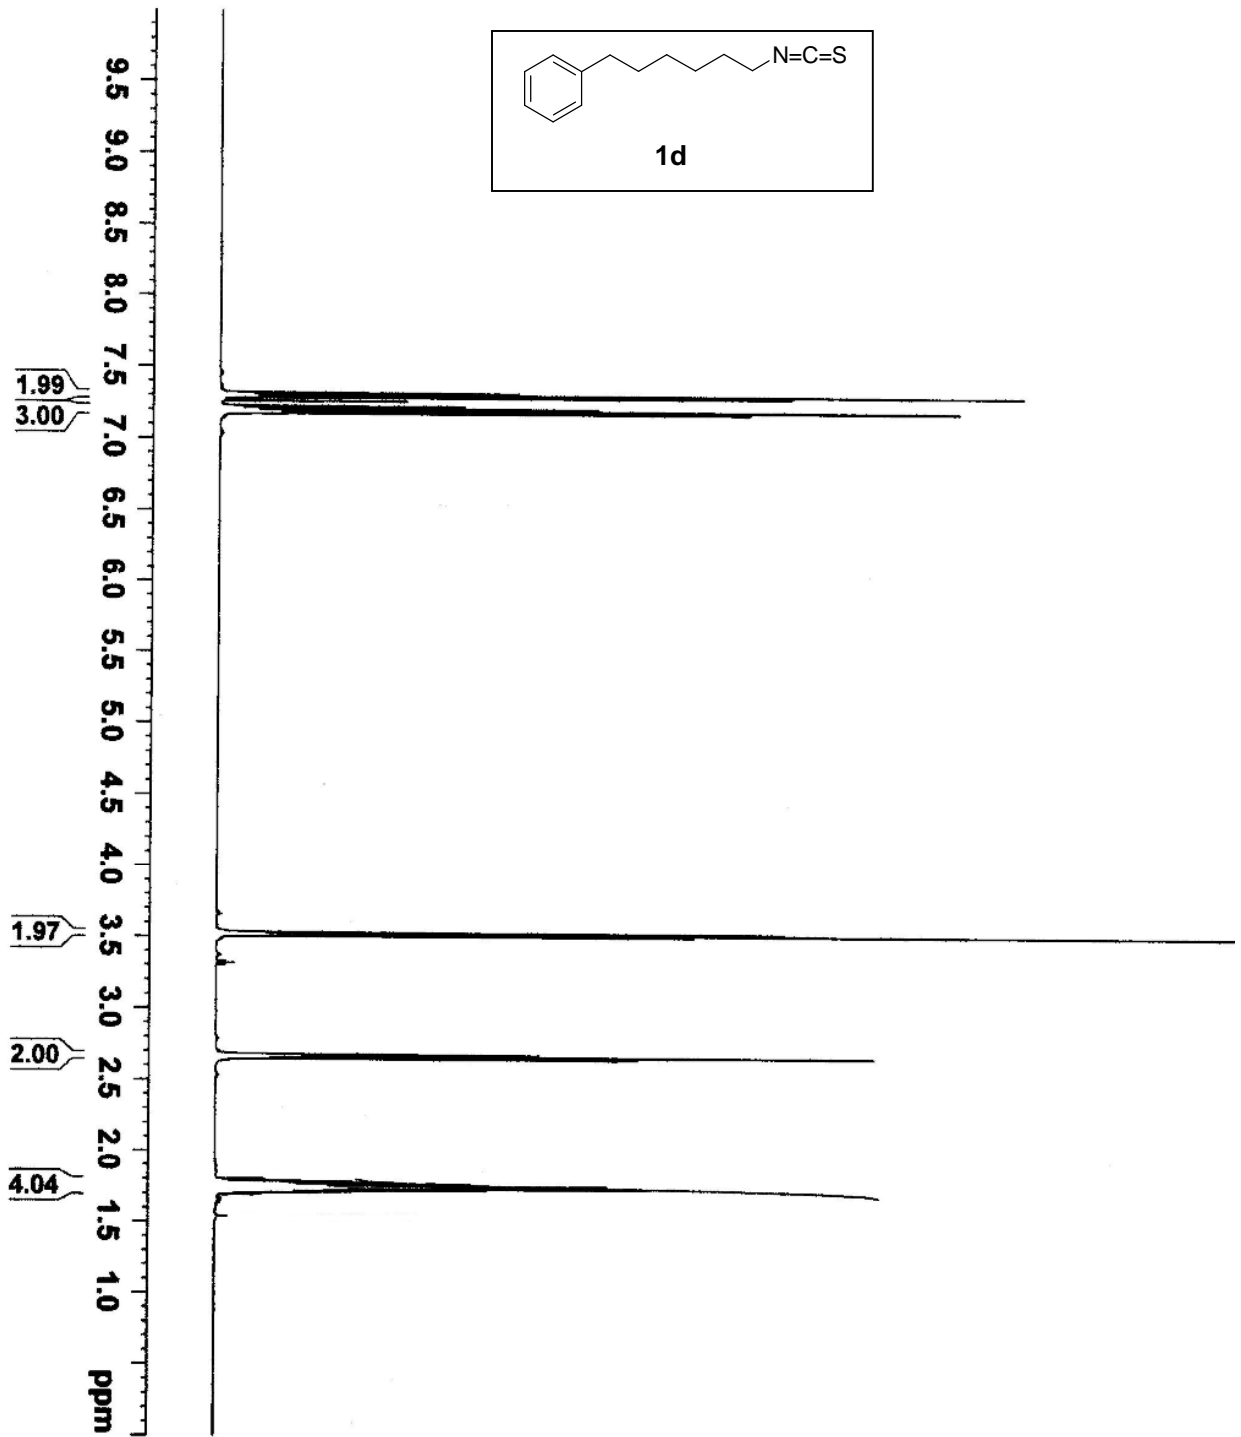

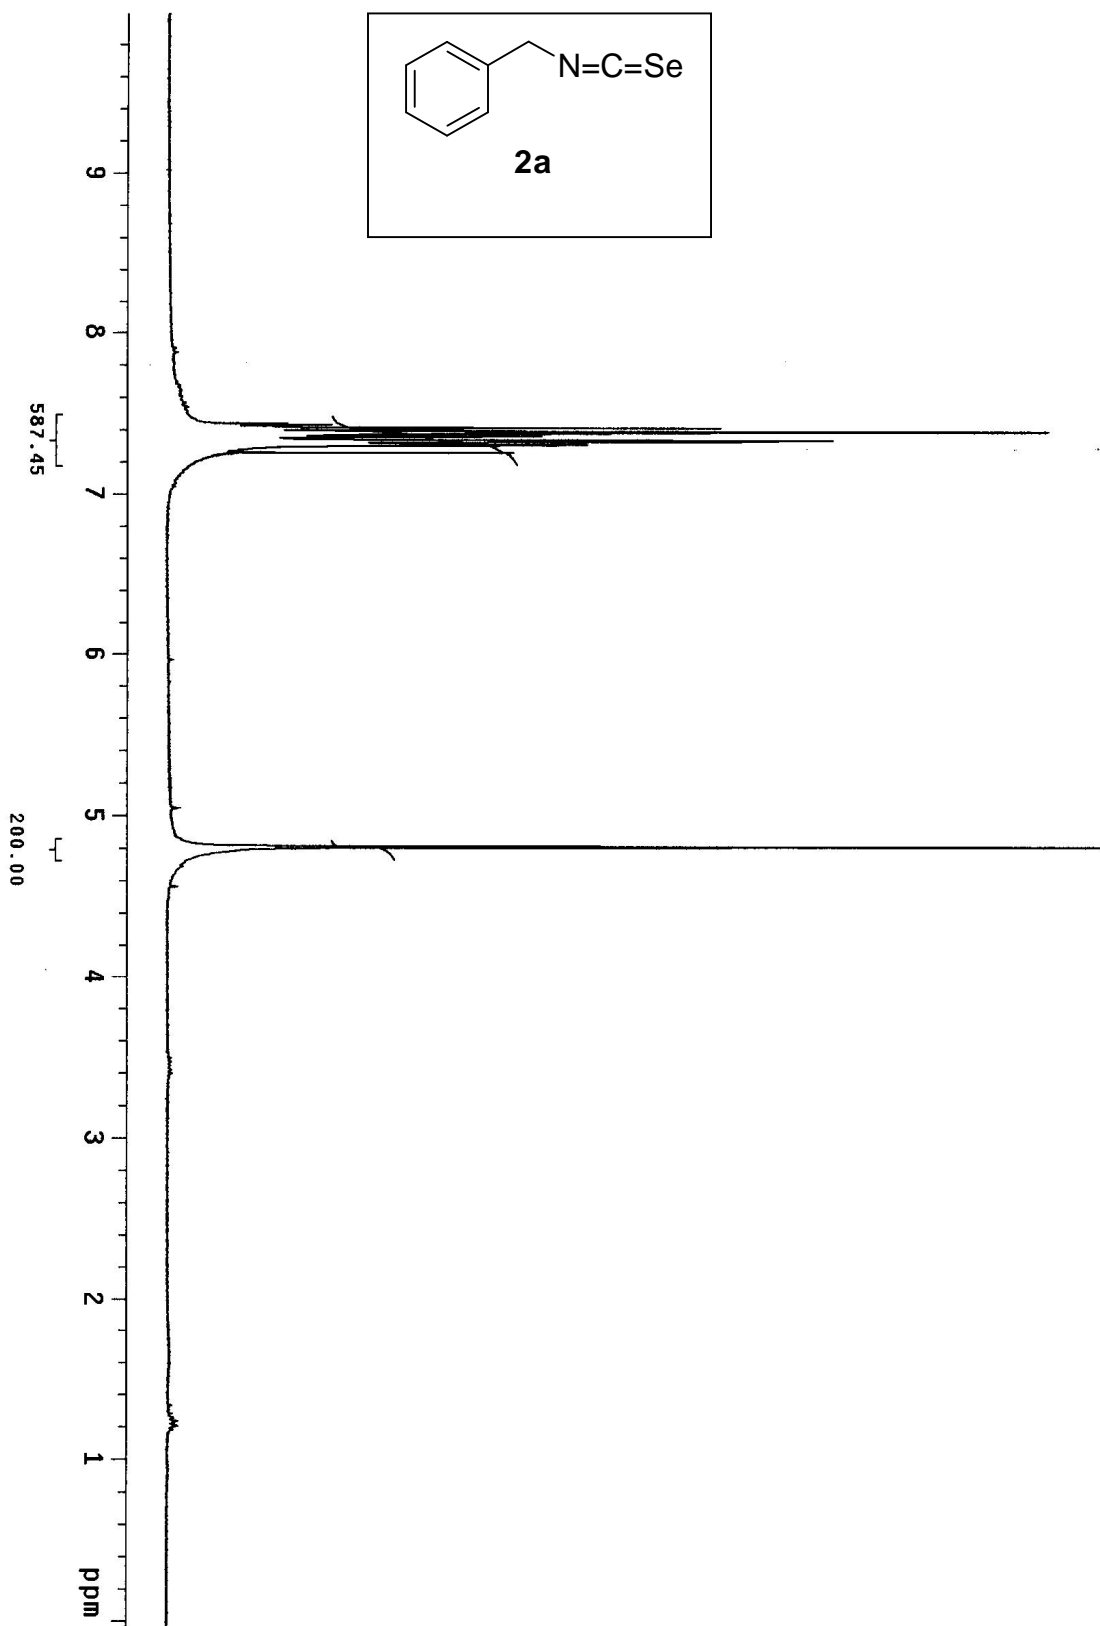

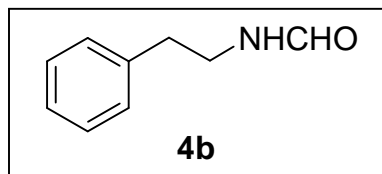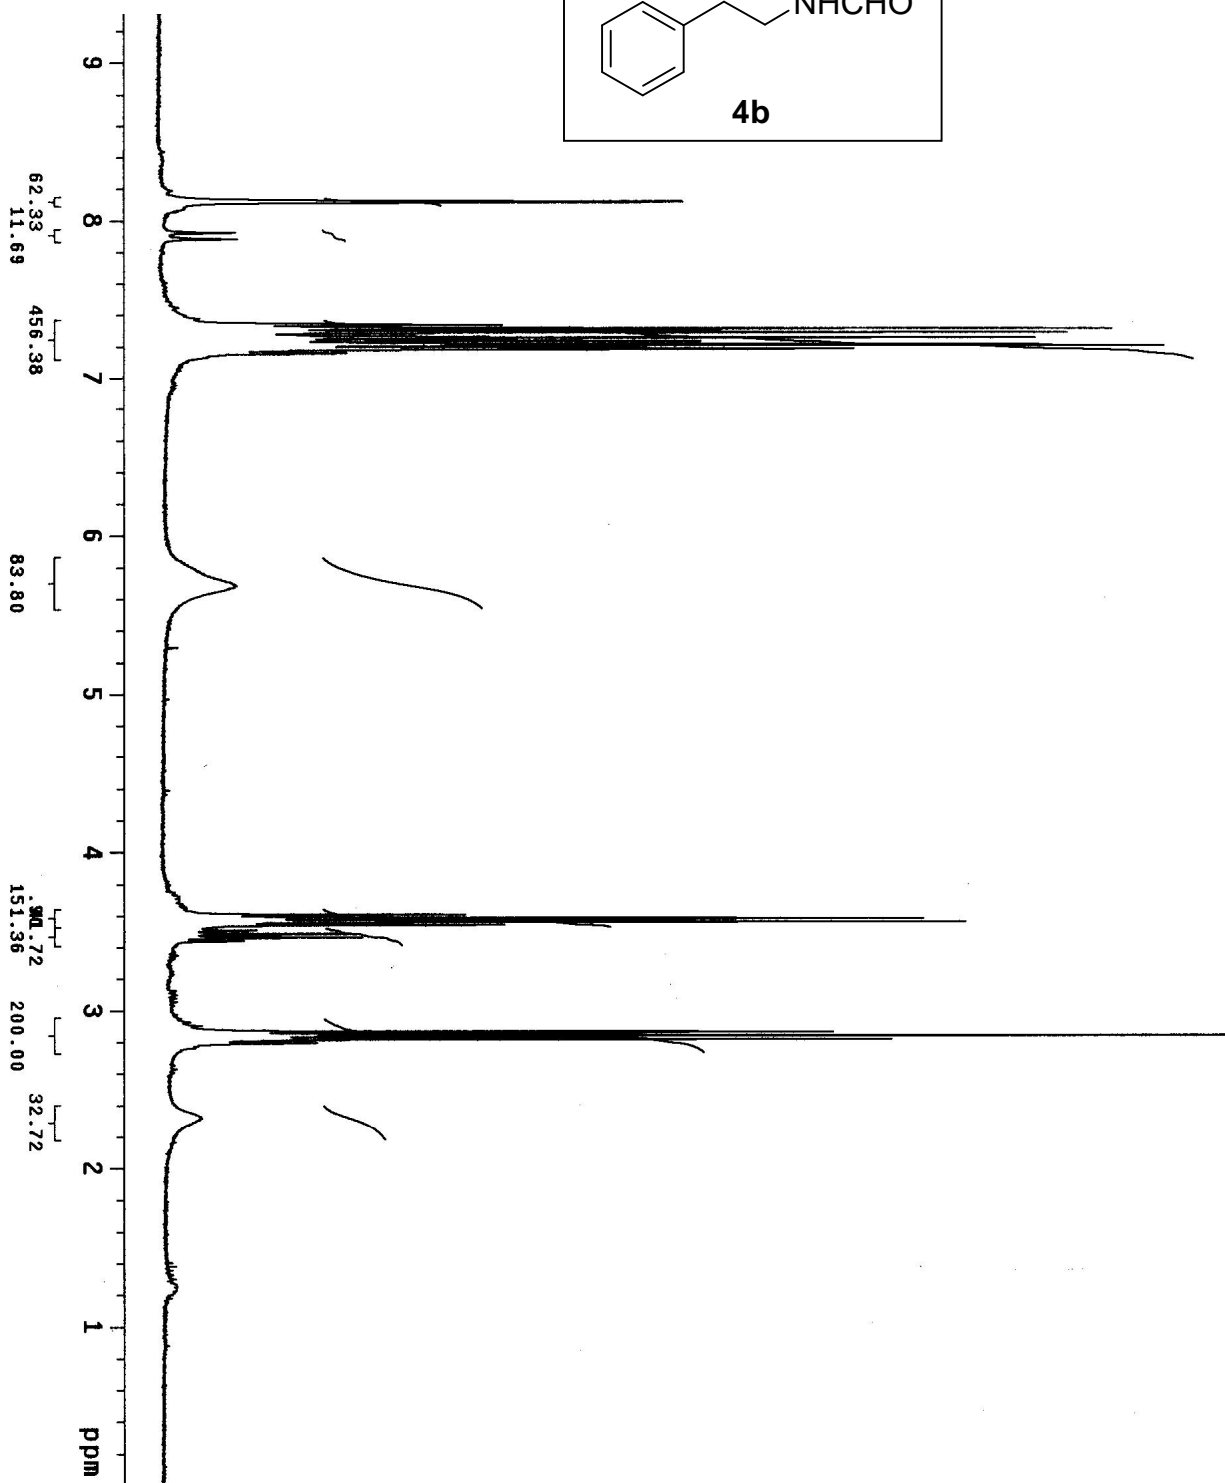

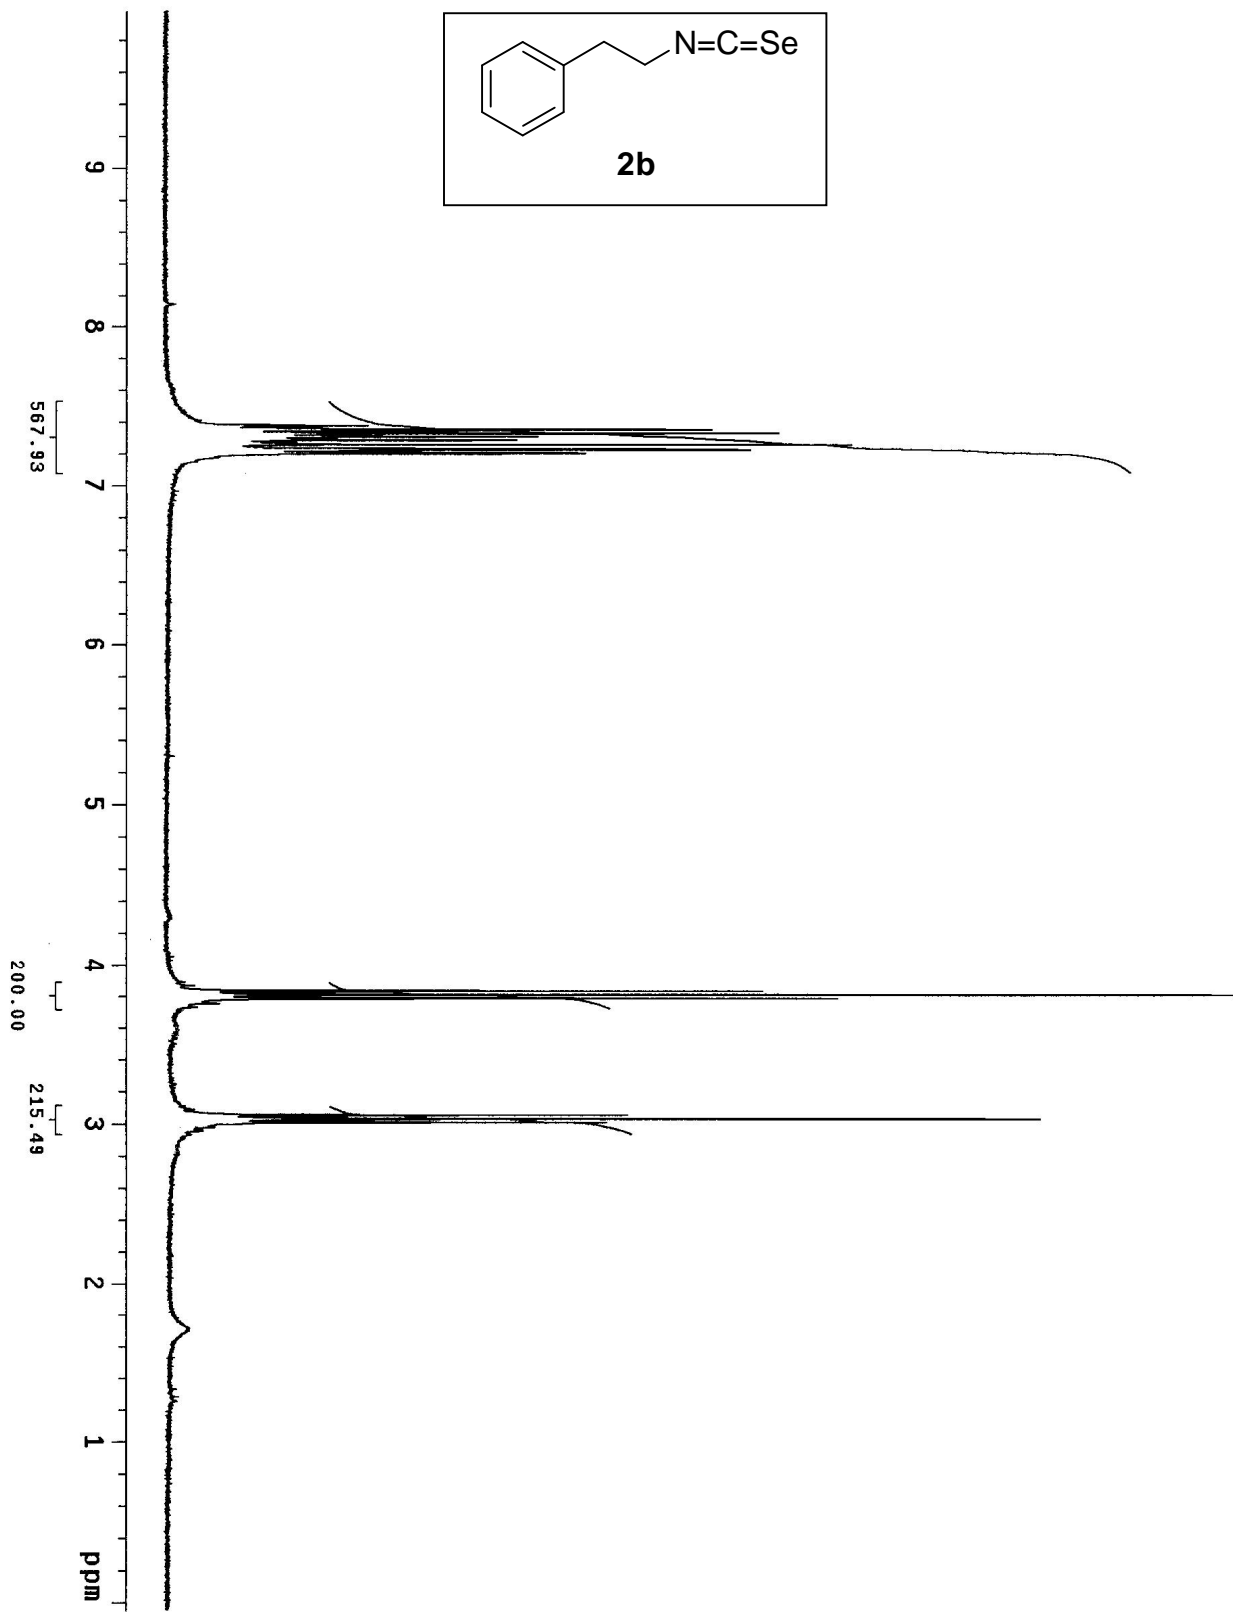

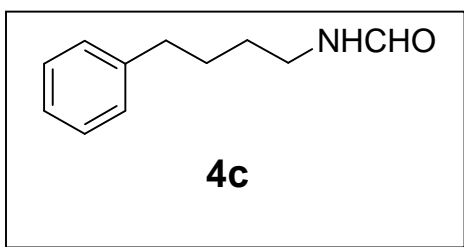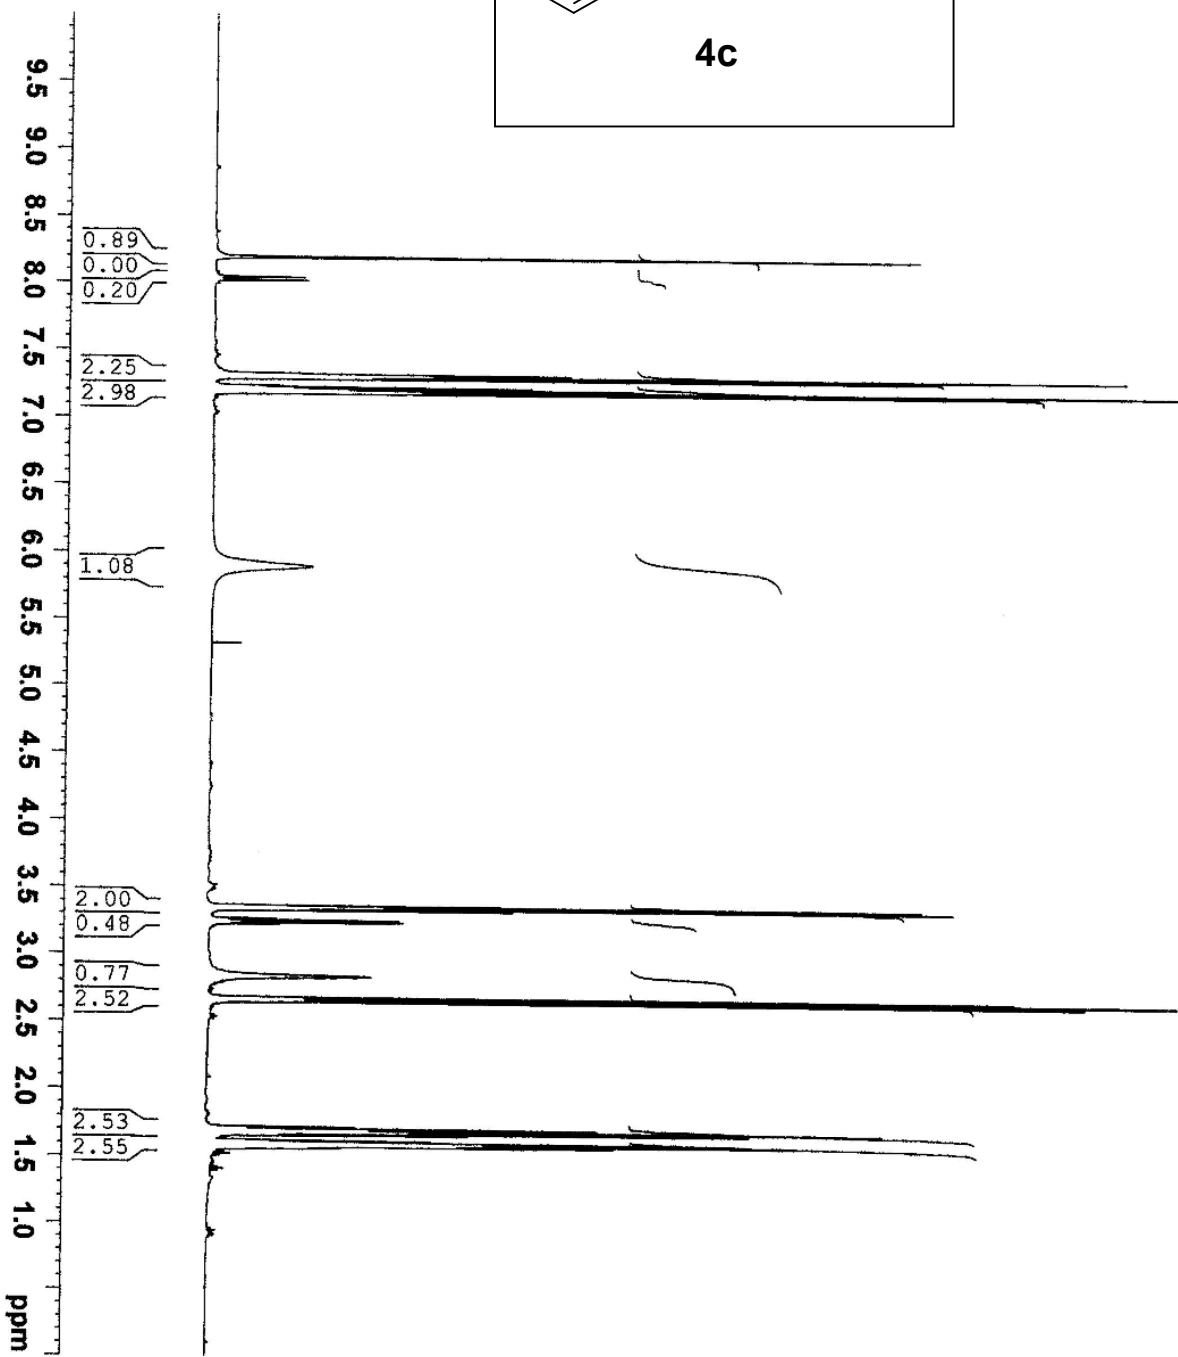



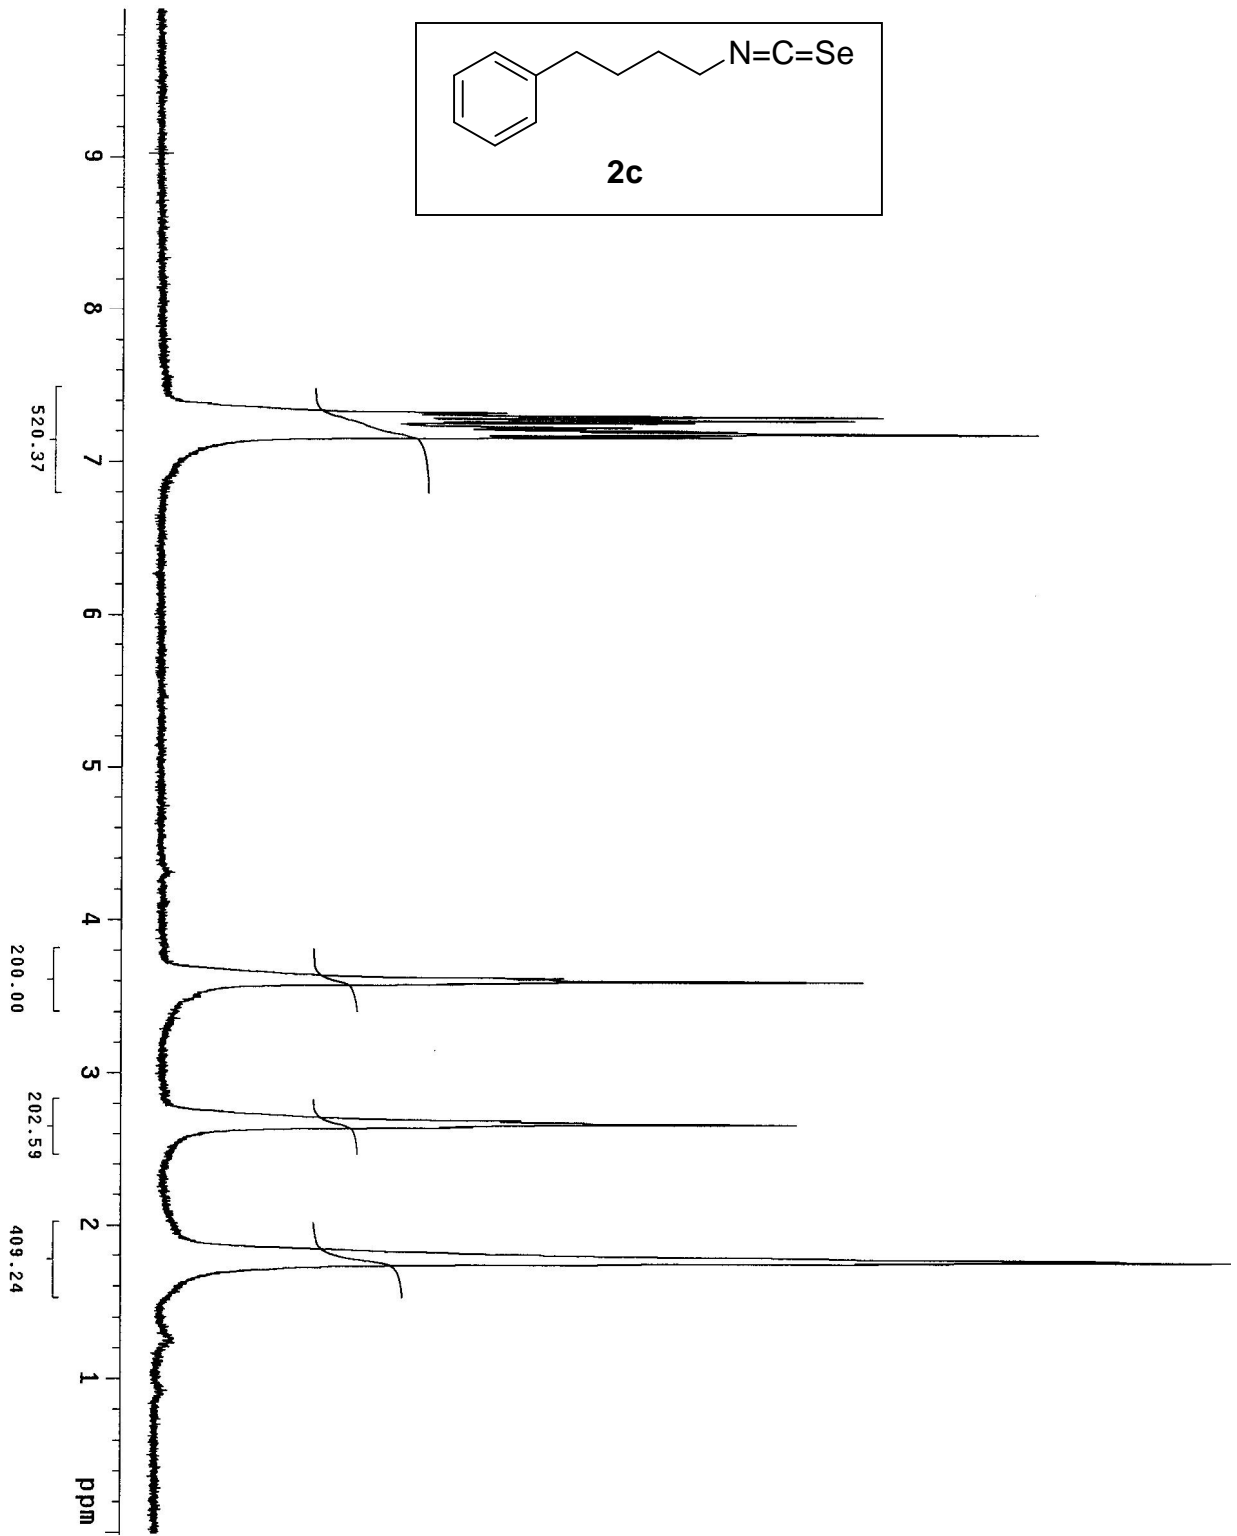

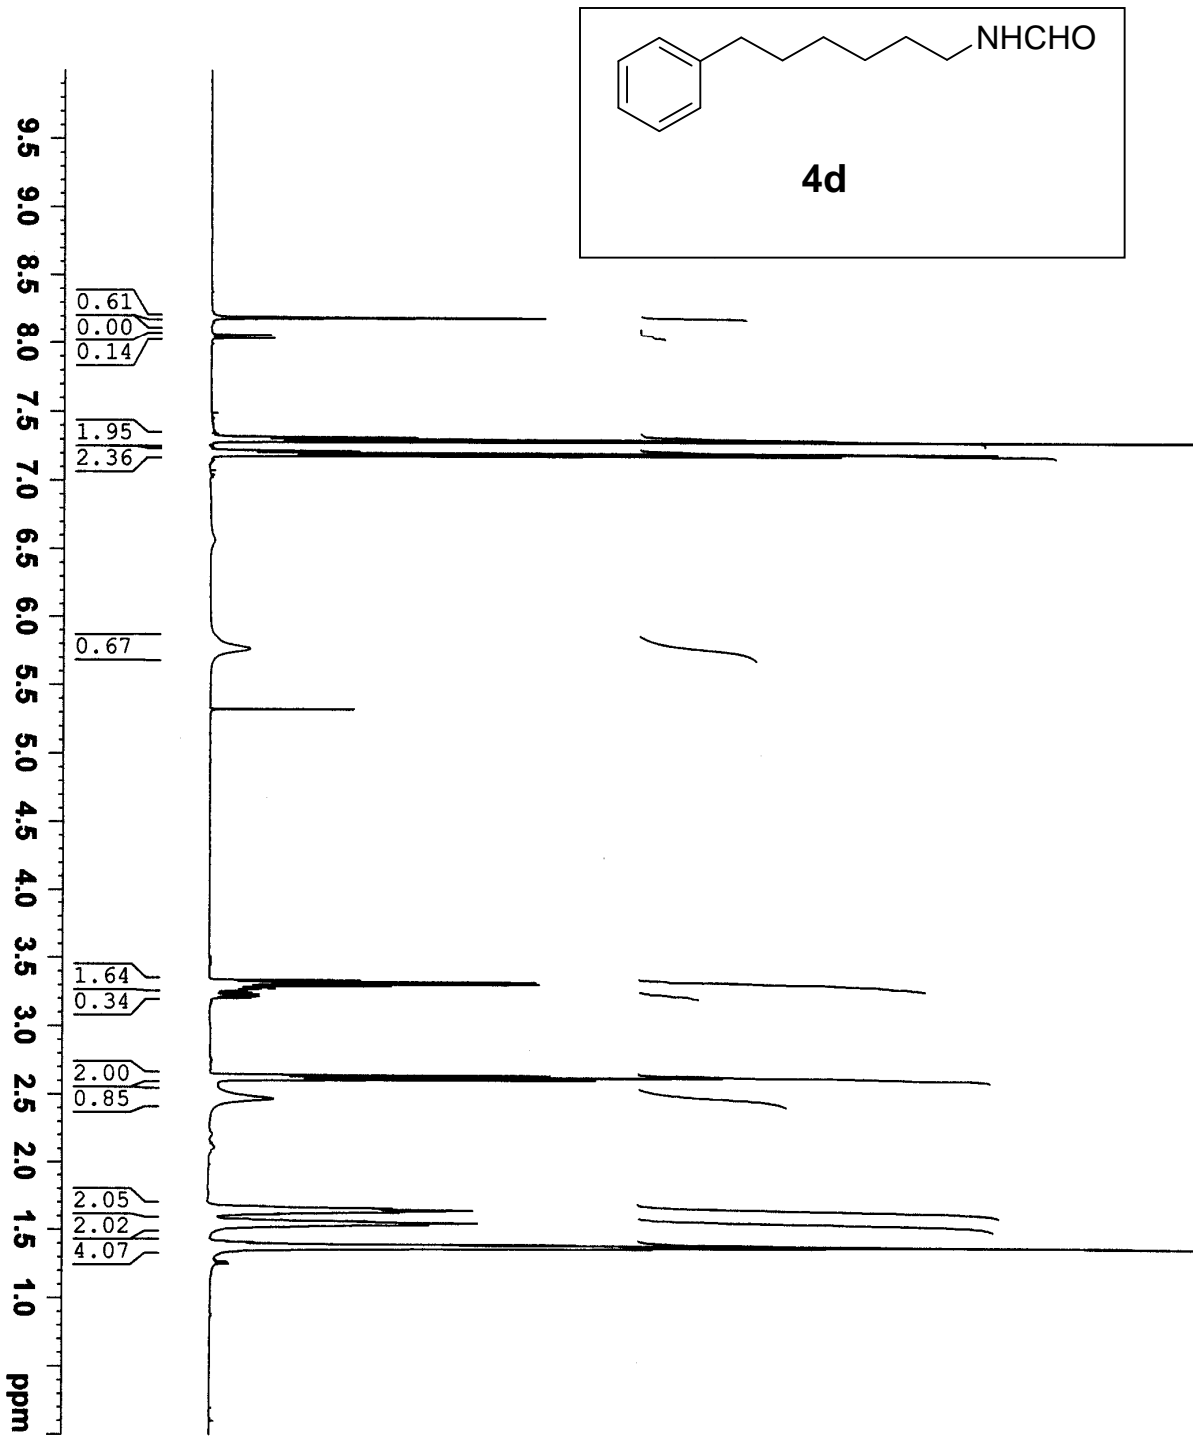

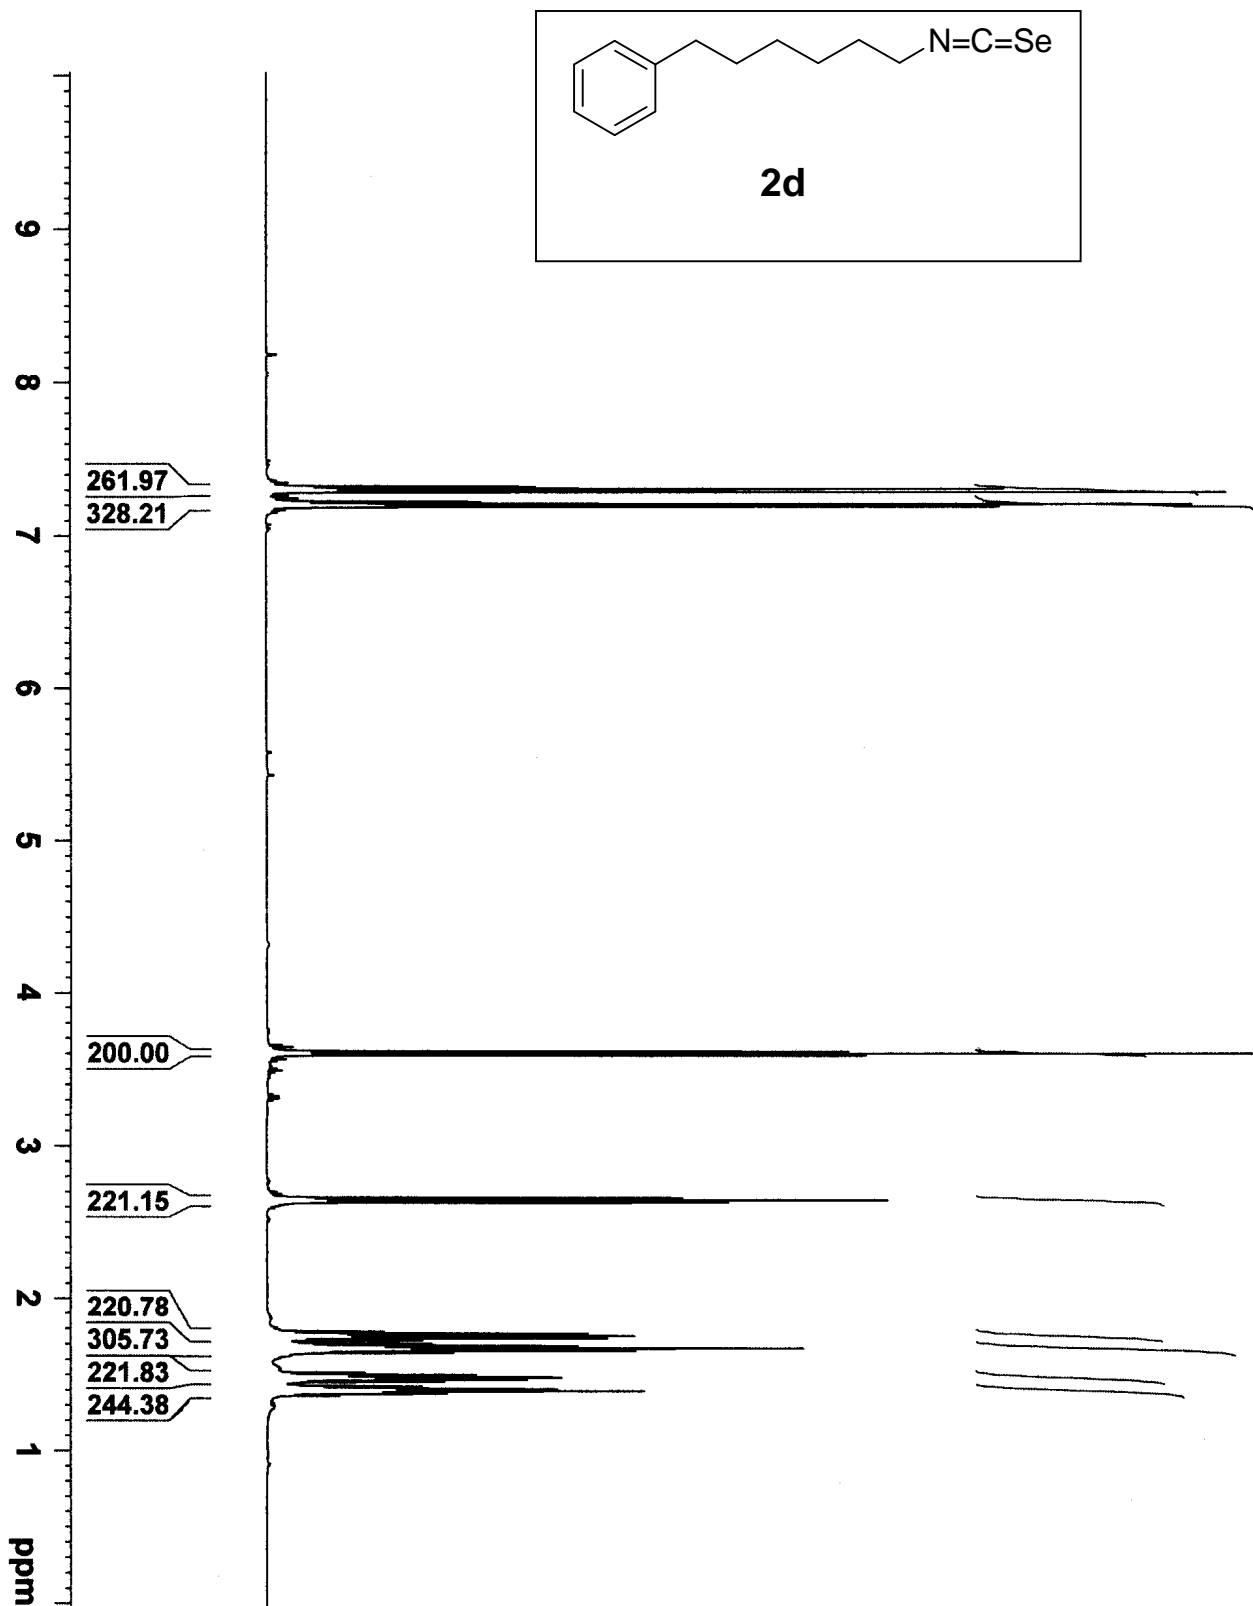

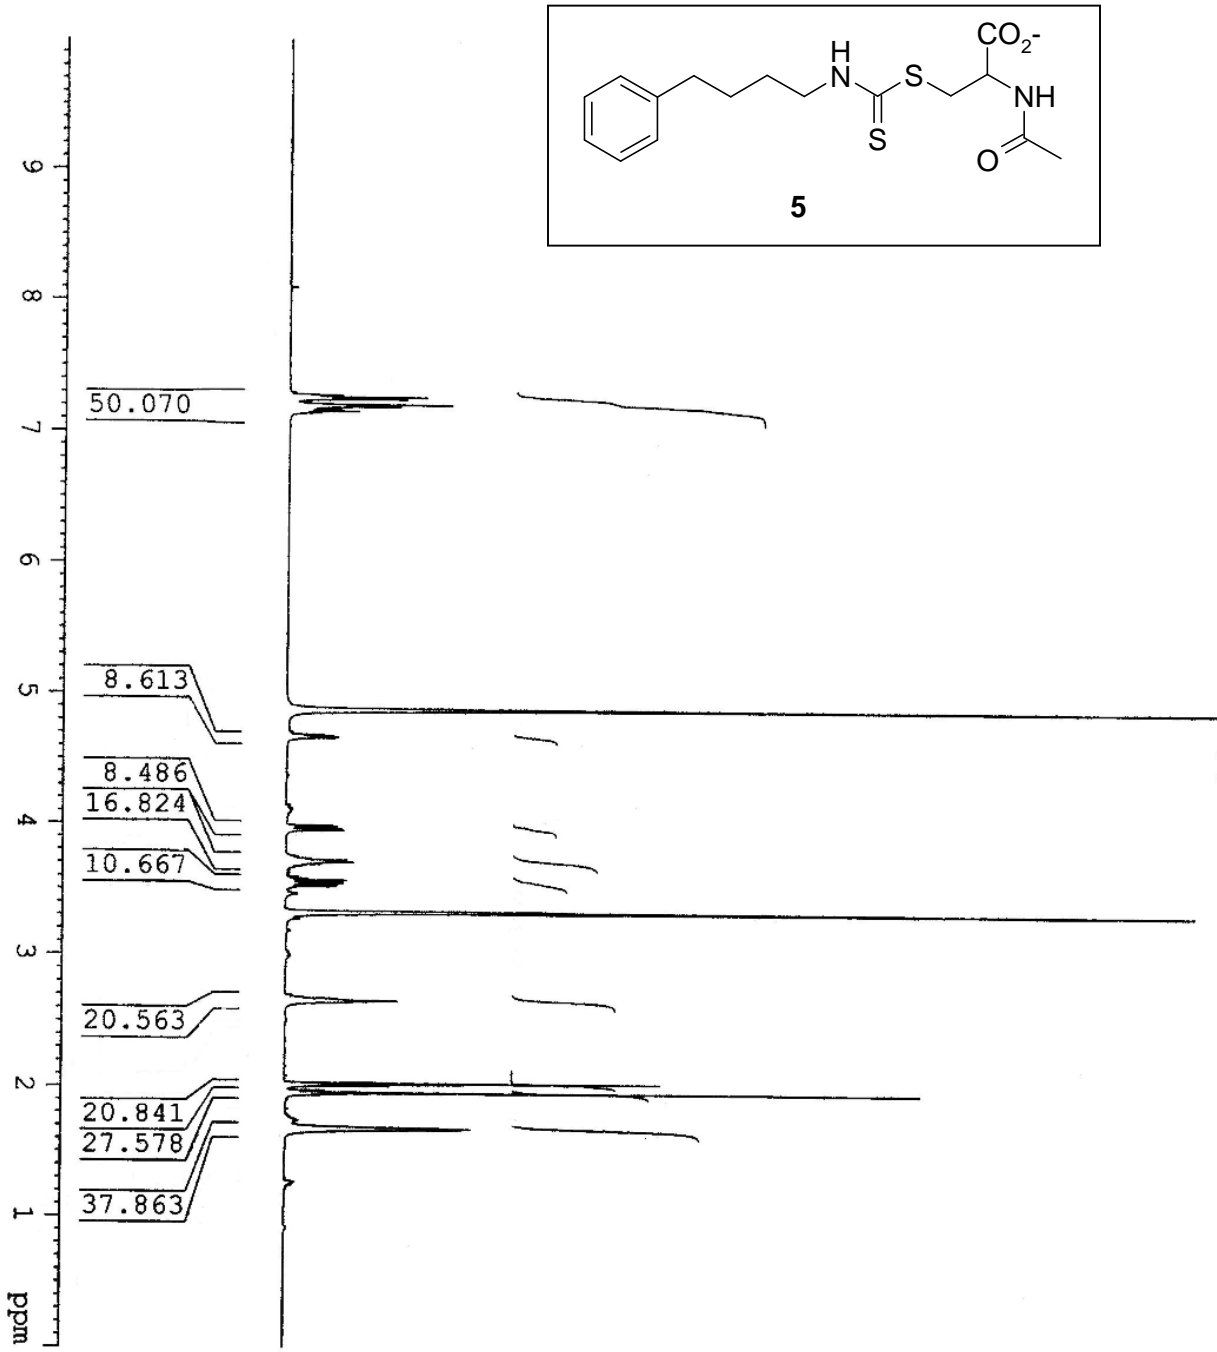

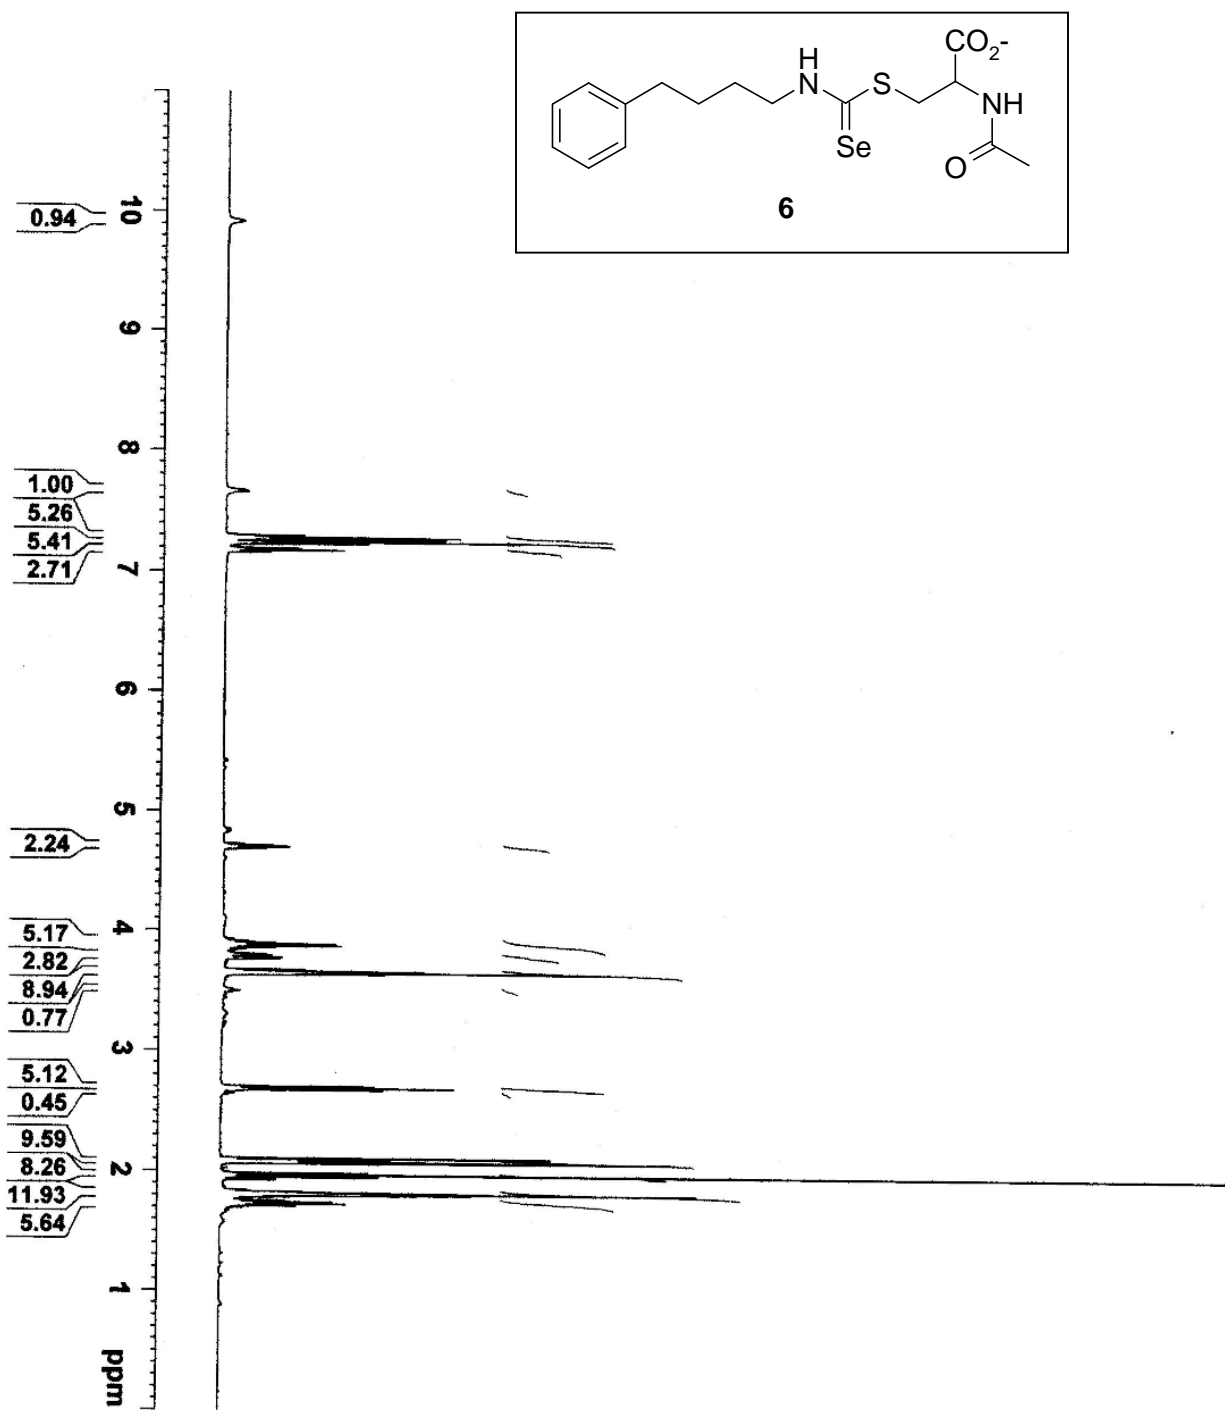

Supplement: NIHMS86625-supplement-1_si_001.pdf [file NIHMS86625-supplement-1_si_001.pdf]
